# Supplementary material for: Dietary Patterns Are Associated with Risk of Prostate Cancer in a Population-Based Case-Control Study in Montreal, Canada
Source: PubMed Central journal article supplement (PMC7399998; doi:10.3390/nu12071907), 2020-06-27
Supplement: nutrients-12-01907-s001.pdf [file nutrients-12-01907-s001.pdf]

## Supplementary Files

Table S1. Odds ratios (OR) and 95% confidence interval (CI) for the association between dietary patterns scores and prostate cancer risk, overall and by tumour grade, based on a minimal model for adjustment, PROtEuS, Montreal, Canada, 2005-2012<sup>1</sup>.

| Quartiles of dietary pattern score   | 1 991    | <u>All prostate cancers</u> |                                   | <u>Low-grade prostate cancers<sup>2</sup></u> |                                  | <u>High-grade prostate cancers<sup>3</sup></u> |                                   |
|--------------------------------------|----------|-----------------------------|-----------------------------------|-----------------------------------------------|----------------------------------|------------------------------------------------|-----------------------------------|
|                                      | controls | 1917 cases                  |                                   | 1385 cases                                    |                                  | 529 cases                                      |                                   |
|                                      | n        | n cases                     | OR (95% CI)                       | n cases                                       | OR (95% CI)                      | n cases                                        | OR (95% CI)                       |
| <b>Healthy Eating</b>                |          |                             |                                   |                                               |                                  |                                                |                                   |
| 1                                    | 497      | 499                         | 1.00 (reference)                  | 335                                           | 1.00 (reference)                 | 163                                            | 1.00 (reference)                  |
| 2                                    | 499      | 505                         | 1.06 (0.88-1.29)                  | 378                                           | 1.19 (0.96-1.46)                 | 126                                            | 0.80 (0.61-1.10)                  |
| 3                                    | 497      | 477                         | 0.99 (0.81-1.21)                  | 343                                           | 1.07 (0.86-1.34)                 | 133                                            | 0.82 (0.62-1.01)                  |
| 4                                    | 498      | 436                         | 1.01 (0.82-1.24)                  | 329                                           | 1.10 (0.89-1.39)                 | 107                                            | 0.86 (0.64-1.15)                  |
|                                      |          |                             | <i>P</i> <sub>trend</sub> = 0.87  |                                               | <i>P</i> <sub>trend</sub> = 0.71 |                                                | <i>P</i> <sub>trend</sub> = 0.27  |
| <b>Western Salty &amp; Alcohol</b>   |          |                             |                                   |                                               |                                  |                                                |                                   |
| 1                                    | 498      | 457                         | 1.00 (reference)                  | 325                                           | 1.00 (reference)                 | 132                                            | 1.00 (reference)                  |
| 2                                    | 498      | 482                         | 0.87 (0.72-1.06)                  | 331                                           | 0.81 (0.65-1.00)                 | 149                                            | 1.04 (0.78-1.39)                  |
| 3                                    | 497      | 482                         | 1.00 (0.82-1.22)                  | 355                                           | 1.00 (0.80-1.24)                 | 126                                            | 0.98 (0.73-1.33)                  |
| 4                                    | 498      | 496                         | 0.84 (0.69-1.03)                  | 374                                           | 0.82 (0.65-1.02)                 | 122                                            | 0.89 (0.66-1.21)                  |
|                                      |          |                             | <i>P</i> <sub>trend</sub> = 0.23  |                                               | <i>P</i> <sub>trend</sub> = 0.35 |                                                | <i>P</i> <sub>trend</sub> = 0.24  |
| <b>Western Sweet &amp; Beverages</b> |          |                             |                                   |                                               |                                  |                                                |                                   |
| 1                                    | 498      | 388                         | 1.00 (reference)                  | 285                                           | 1.00 (reference)                 | 103                                            | 1.00 (reference)                  |
| 2                                    | 498      | 442                         | 1.14 (0.93-1.38)                  | 325                                           | 1.13 (0.92-1.41)                 | 117                                            | 1.14 (0.84-1.53)                  |
| 3                                    | 498      | 494                         | 1.16 (0.96-1.41)                  | 360                                           | 1.17 (0.94-1.45)                 | 134                                            | 1.15 (0.85-1.56)                  |
| 4                                    | 497      | 593                         | 1.32 (1.09-1.61)                  | 415                                           | 1.24 (1.00-1.55)                 | 175                                            | 1.50 (1.12-2.03)                  |
|                                      |          |                             | <i>P</i> <sub>trend</sub> = 0.007 |                                               | <i>P</i> <sub>trend</sub> = 0.05 |                                                | <i>P</i> <sub>trend</sub> = 0.006 |

<sup>1</sup>Adjusted for age, ancestry, education, and marital status.

<sup>2</sup>Prostate cancer cases with a Gleason score ≤ 6, or 7 with a primary score of 3.

<sup>3</sup>Prostate cancer cases with a Gleason score of 7 with a primary score of 4, or ≥ 8.

Table S2. Odds ratios (OR) and 95% confidence interval (CI) for the association between dietary patterns score and prostate cancer risk, overall and by tumour grade, excluding controls who had not been screened for PCa in the previous 2 years, PROtEuS, Montreal, Canada, 2005-2012<sup>1</sup>.

| Quartiles of dietary pattern score   | 1 242 controls<br>n | <u>All prostate cancers</u><br>1816 cases |                                  | <u>Low-grade prostate cancers</u> <sup>2</sup><br>1311 cases |                                  | <u>High-grade prostate cancers</u> <sup>3</sup><br>502 cases |                                  |
|--------------------------------------|---------------------|-------------------------------------------|----------------------------------|--------------------------------------------------------------|----------------------------------|--------------------------------------------------------------|----------------------------------|
|                                      |                     | n cases                                   | OR (95% CI)                      | n cases                                                      | OR (95% CI)                      | n cases                                                      | OR (95% CI)                      |
| <b>Healthy Eating</b>                |                     |                                           |                                  |                                                              |                                  |                                                              |                                  |
| 1                                    | 270                 | 436                                       | 1.00 (reference)                 | 287                                                          | 1.00 (reference)                 | 148                                                          | 1.00 (reference)                 |
| 2                                    | 311                 | 481                                       | 0.95 (0.76-1.17)                 | 363                                                          | 1.08 (0.86-1.36)                 | 117                                                          | 0.70 (0.52-0.94)                 |
| 3                                    | 322                 | 440                                       | 0.83 (0.67-1.04)                 | 323                                                          | 0.91 (0.71-1.15)                 | 116                                                          | 0.67 (0.50-0.91)                 |
| 4                                    | 339                 | 459                                       | 0.84 (0.67-1.04)                 | 338                                                          | 0.91 (0.71-1.17)                 | 121                                                          | 0.69 (0.51-0.94)                 |
|                                      |                     |                                           | <i>P</i> <sub>trend</sub> = 0.06 |                                                              | <i>P</i> <sub>trend</sub> = 0.18 |                                                              | <i>P</i> <sub>trend</sub> = 0.01 |
| <b>Western Salty &amp; Alcohol</b>   |                     |                                           |                                  |                                                              |                                  |                                                              |                                  |
| 1                                    | 306                 | 462                                       | 1.00 (reference)                 | 336                                                          | 1.00 (reference)                 | 126                                                          | 1.00 (reference)                 |
| 2                                    | 333                 | 429                                       | 0.80 (0.65-0.99)                 | 292                                                          | 0.74 (0.59-0.94)                 | 135                                                          | 0.94 (0.70-1.27)                 |
| 3                                    | 286                 | 469                                       | 0.98 (0.79-1.22)                 | 349                                                          | 0.99 (0.78-1.25)                 | 119                                                          | 0.95 (0.69-1.29)                 |
| 4                                    | 317                 | 456                                       | 0.82 (0.65-1.02)                 | 334                                                          | 0.80 (0.63-1.01)                 | 122                                                          | 0.84 (0.61-1.15)                 |
|                                      |                     |                                           | <i>P</i> <sub>trend</sub> = 0.26 |                                                              | <i>P</i> <sub>trend</sub> = 0.43 |                                                              | <i>P</i> <sub>trend</sub> = 0.24 |
| <b>Western Sweet &amp; Beverages</b> |                     |                                           |                                  |                                                              |                                  |                                                              |                                  |
| 1                                    | 308                 | 415                                       | 1.00 (reference)                 | 303                                                          | 1.00 (reference)                 | 112                                                          | 1.00 (reference)                 |
| 2                                    | 321                 | 443                                       | 1.03 (0.84-1.28)                 | 326                                                          | 1.05 (0.83-1.32)                 | 117                                                          | 1.03 (0.76-1.41)                 |
| 3                                    | 307                 | 469                                       | 1.17 (0.90-1.39)                 | 348                                                          | 1.14 (0.90-1.45)                 | 121                                                          | 1.09 (0.79-1.50)                 |
| 4                                    | 306                 | 489                                       | 1.21 (0.98-1.51)                 | 334                                                          | 1.16 (0.91-1.47)                 | 152                                                          | 1.39 (1.02-1.91)                 |
|                                      |                     |                                           | <i>P</i> <sub>trend</sub> = 0.06 |                                                              | <i>P</i> <sub>trend</sub> = 0.20 |                                                              | <i>P</i> <sub>trend</sub> = 0.01 |

<sup>1</sup> Adjusted for age, ancestry, education, first-degree family history of prostate cancer, and timing of last prostate cancer screening.

<sup>2</sup> Prostate cancer cases with a Gleason score ≤ 6, or 7 with a primary score of 3.

<sup>3</sup> Prostate cancer cases with a Gleason score of 7 with a primary score of 4, or ≥ 8.
